# Supplementary material
Source: PubMed Central journal article supplement (PMC7380510)
Supplement: NIHMS1541482-supplement-1.pdf [file NIHMS1541482-supplement-1.pdf]

Supplementary Materials (Online only)

Supplementary Table S1. Characteristics of male breast cancer patients by receipt of Oncotype DX Recurrence Score (RS) testing

|                                                                                 | Primary Analysis |                       |        | Sensitivity Analysis * |                       |        |
|---------------------------------------------------------------------------------|------------------|-----------------------|--------|------------------------|-----------------------|--------|
|                                                                                 | RS<br>(N=848, %) | No RS<br>(N=2,552, %) | P      | RS<br>(N=595, %)       | No RS<br>(N=1,073, %) | P      |
| <b>Age (years, Mean ± SD)</b>                                                   | 61.9 ± 10.4      | 64.9 ± 12.3           | <0.001 | 61.5 ± 10.5            | 65.2 ± 11.6           | <0.001 |
| <b>Year of Diagnosis</b>                                                        |                  |                       | <0.001 |                        |                       | 0.12   |
| 2010                                                                            | 12.3             | 19.4                  |        | 12.9                   | 17.7                  |        |
| 2011                                                                            | 20.3             | 18.7                  |        | 20.5                   | 18.8                  |        |
| 2012                                                                            | 20.5             | 20.1                  |        | 20.3                   | 20.7                  |        |
| 2013                                                                            | 23.3             | 21.4                  |        | 23.7                   | 22.9                  |        |
| 2014                                                                            | 23.6             | 20.5                  |        | 22.5                   | 19.9                  |        |
| <b>Tumor Size (mm, Mean ± SD) #</b>                                             | 19.7 ± 9.5       | 21.2 ± 17.0           | 0.02   | 19.2 ± 9.1             | 19.4 ± 17.9           | 0.81   |
| <b>Lymph Node Metastasis</b>                                                    | 19.0             | 36.2                  | <0.001 | 100.0                  | 100.0                 | -      |
| <b>Positive Progesterone Receptor</b>                                           | 92.7             | 92.8                  | 0.27   | 92.8                   | 93.7                  | 0.56   |
| <b>Grade</b>                                                                    |                  |                       | 0.02   |                        |                       | 0.03   |
| I                                                                               | 20.5             | 21.8                  |        | 23.2                   | 26.0                  |        |
| II                                                                              | 52.4             | 47.2                  |        | 51.8                   | 47.2                  |        |
| III                                                                             | 21.1             | 22.3                  |        | 19.5                   | 17.9                  |        |
| Unknown                                                                         | 6.0              | 8.7                   |        | 5.5                    | 8.9                   |        |
| <b>Ductal Histology</b>                                                         | 83.0             | 82.5                  | 0.34   | 82.2                   | 79.9                  | 0.11   |
| <b>Lymph Vascular Invasion</b>                                                  | 18.2             | 22.7                  | <0.001 | 13.4                   | 12.3                  | 0.77   |
| <b>Comorbidity</b>                                                              | 19.9             | 22.3                  | 0.17   | 20.7                   | 21.4                  | 0.76   |
| <b>Mastectomy</b>                                                               | 74.4             | 77.5                  | 0.07   | 74.3                   | 69.6                  | 0.05   |
| <b>Chemotherapy</b>                                                             | 22.6             | 35.0                  | <0.001 | 19.7                   | 22.1                  | 0.24   |
| <b>Endocrine Therapy</b>                                                        | 86.0             | 67.4                  | <0.001 | 100.0                  | 100.0                 | -      |
| <b>Radiation Therapy</b>                                                        | 32.1             | 33.5                  | 0.10   | 28.9                   | 33.8                  | 0.07   |
| <b>Race</b>                                                                     |                  |                       | 0.37   |                        |                       | 0.60   |
| White                                                                           | 86.3             | 84.8                  |        | 86.7                   | 85.4                  |        |
| Black                                                                           | 10.1             | 11.2                  |        | 10.4                   | 10.7                  |        |
| Other                                                                           | 2.7              | 2.5                   |        | 2.0                    | 2.3                   |        |
| Unknown                                                                         | 0.8              | 1.5                   |        | 0.8                    | 1.6                   |        |
| <b>Insurance</b>                                                                |                  |                       | <0.001 |                        |                       | 0.002  |
| No Insurance                                                                    | 2.0              | 2.1                   |        | 1.8                    | 1.4                   |        |
| Private Insurance                                                               | 52.0             | 42.6                  |        | 51.8                   | 42.4                  |        |
| Government Insurance                                                            | 44.7             | 53.8                  |        | 45.2                   | 54.7                  |        |
| Unknown                                                                         | 1.3              | 1.6                   |        | 1.2                    | 1.5                   |        |
| <b>Residence <sup>1</sup></b>                                                   |                  |                       | 0.60   |                        |                       | 0.20   |
| Metro                                                                           | 83.3             | 83.7                  |        | 81.2                   | 81.9                  |        |
| Urban                                                                           | 12.3             | 12.5                  |        | 14.3                   | 14.9                  |        |
| Rural                                                                           | 1.3              | 1.4                   |        | 1.5                    | 1.7                   |        |
| Unknown                                                                         | 3.2              | 2.4                   |        | 3.0                    | 1.5                   |        |
| <b>Annual Household Income <sup>2</sup></b>                                     |                  |                       | 0.38   |                        |                       | 0.57   |
| <\$30000                                                                        | 11.9             | 12.0                  |        | 12.1                   | 12.5                  |        |
| \$30000-\$34999                                                                 | 16.6             | 19.0                  |        | 17.6                   | 20.0                  |        |
| \$35000-\$45999                                                                 | 26.5             | 27.3                  |        | 26.4                   | 27.6                  |        |
| ≥\$46000                                                                        | 43.9             | 40.4                  |        | 42.5                   | 38.5                  |        |
| Unknown                                                                         | 1.1              | 1.3                   |        | 1.3                    | 1.4                   |        |
| <b>Education Attainment (percent of no high school graduation) <sup>2</sup></b> |                  |                       | 0.01   |                        |                       | 0.09   |
| ≥29%                                                                            | 9.8              | 13.5                  |        | 9.9                    | 13.9                  |        |
| 20%-28.9%                                                                       | 20.8             | 22.6                  |        | 21.3                   | 22.7                  |        |
| 14%-19.9%                                                                       | 29.4             | 28.8                  |        | 28.6                   | 28.3                  |        |
| <14%                                                                            | 38.9             | 33.7                  |        | 38.7                   | 33.6                  |        |
| Unknown                                                                         | 1.2              | 1.3                   |        | 1.5                    | 1.4                   |        |

|                           | Primary Analysis |                       |          | Sensitivity Analysis * |                       |          |
|---------------------------|------------------|-----------------------|----------|------------------------|-----------------------|----------|
|                           | RS<br>(N=848, %) | No RS<br>(N=2,552, %) | <i>P</i> | RS<br>(N=595, %)       | No RS<br>(N=1,073, %) | <i>P</i> |
| <b>Facility Type</b>      |                  |                       | 0.25     |                        |                       | 0.97     |
| Community                 | 11.0             | 12.7                  |          | 12.0                   | 12.8                  |          |
| Comprehensive Community   | 47.5             | 47.8                  |          | 46.9                   | 46.2                  |          |
| Academic/Research Program | 31.0             | 27.9                  |          | 30.1                   | 29.8                  |          |
| Integrated Network        | 10.6             | 11.6                  |          | 11.0                   | 11.2                  |          |

\* Only patients with negative lymph node and receipt of endocrine therapy was included.

# Exact tumor size was not available for 5 patients with RS testing and 27 patients without RS testing in the primary analysis; while for 3 patients with RS testing and 9 patients without RS testing in the sensitivity analysis.

1. Residence was estimated by matching patients' Federal Information Processing Standards codes against US Department of Agriculture Economic Research Service records from 2003 or 2013, depending on the time of diagnosis.

2. Annual household income and educational attainment were estimated by matching patients' zip codes against American Community Survey data from 2000 or 2012, depending on the time of diagnosis.

**Supplementary Table S2. HRs (95% CI) for total mortality associated with the Recurrence Score categories among patients ≤ 50 years**

|                                        | Deaths /Patients | CT (%) | ET (%) | Male Patients         | Deaths /Patients | CT (%) | ET (%) | Female Patients       |
|----------------------------------------|------------------|--------|--------|-----------------------|------------------|--------|--------|-----------------------|
|                                        |                  |        |        | Hazard Ratio (95% CI) |                  |        |        | Hazard Ratio (95% CI) |
| <b>Continuous Scale</b>                |                  |        |        |                       |                  |        |        |                       |
| <b>Age-adjusted</b>                    | 4/129            | 33.3   | 90.7   | 0.98 (0.88 to 1.08)   | 289/28,320       | 32.4   | 92.1   | 1.04 (1.04 to 1.05)   |
| <b>Adjusted<sup>1</sup></b>            | 4/129            | 33.3   | 90.7   | -                     | 289/28,320       | 32.4   | 92.1   | 1.03 (1.02 to 1.04)   |
| <b>Fully-Adjusted<sup>2</sup></b>      | 4/129            | 33.3   | 90.7   | -                     | 289/28,320       | 32.4   | 92.1   | 1.03 (1.02 to 1.04)   |
| <b>Traditional Cutoffs<sup>*</sup></b> |                  |        |        |                       |                  |        |        |                       |
| <b>Age-adjusted</b>                    |                  |        |        |                       |                  |        |        |                       |
| Low risk                               | 2/69             | 11.6   | 92.8   | reference             | 89/16,844        | 12.3   | 92.8   | reference             |
| Intermediate risk                      | 2/44             | 45.5   | 93.2   | 2.72 (0.36 to 20.48)  | 110/9,289        | 55.5   | 92.2   | 2.07 (1.57 to 2.74)   |
| High risk                              | 0/16             | 93.8   | 75.0   | -                     | 90/2,187         | 89.3   | 86.5   | 3.07 (2.76 to 3.41)   |
| <b>Adjusted<sup>1</sup></b>            |                  |        |        |                       |                  |        |        |                       |
| Low risk                               | 2/69             | 11.6   | 92.8   | reference             | 89/16,844        | 12.3   | 92.8   | reference             |
| Intermediate risk                      | 2/44             | 45.5   | 93.2   | -                     | 110/9,289        | 55.5   | 92.2   | 1.89 (1.42 to 2.52)   |
| High risk                              | 0/16             | 93.8   | 75.0   | -                     | 90/2,187         | 89.3   | 86.5   | 4.65 (3.25 to 6.65)   |
| <b>Fully-Adjusted<sup>2</sup></b>      |                  |        |        |                       |                  |        |        |                       |
| Low risk                               | 2/69             | 11.6   | 92.8   | reference             | 89/16,844        | 12.3   | 92.8   | reference             |
| Intermediate risk                      | 2/44             | 45.5   | 93.2   | -                     | 110/9,289        | 55.5   | 92.2   | 1.88 (1.39 to 2.56)   |
| High risk                              | 0/16             | 93.8   | 75.0   | -                     | 90/2,187         | 89.3   | 86.5   | 4.63 (3.11 to 6.90)   |
| <b>TAILORx Cutoffs<sup>#</sup></b>     |                  |        |        |                       |                  |        |        |                       |
| <b>Age-adjusted</b>                    |                  |        |        |                       |                  |        |        |                       |
| Low risk                               | 2/33             | 9.1    | 90.9   | reference             | 27/5,543         | 8.5    | 92.6   | reference             |
| Intermediate risk                      | 2/69             | 24.6   | 95.7   | 0.77 (0.10 to 5.91)   | 127/18,833       | 28.3   | 92.7   | 1.27 (0.84 to 1.93)   |
| High risk                              | 0/27             | 85.2   | 77.8   | -                     | 135/3,944        | 92.8   | 88.7   | 6.46 (4.27 to 9.79)   |
| <b>Adjusted<sup>1</sup></b>            |                  |        |        |                       |                  |        |        |                       |
| Low risk                               | 2/33             | 9.1    | 90.9   | reference             | 27/5,543         | 8.5    | 92.6   | reference             |
| Intermediate risk                      | 2/69             | 24.6   | 95.7   | -                     | 127/18,833       | 28.3   | 92.7   | 1.20 (0.79 to 1.83)   |
| High risk                              | 0/27             | 85.2   | 77.8   | -                     | 135/3,944        | 92.8   | 88.7   | 4.43 (2.83 to 6.96)   |
| <b>Fully-Adjusted<sup>2</sup></b>      |                  |        |        |                       |                  |        |        |                       |
| Low risk                               | 2/33             | 9.1    | 90.9   | reference             | 27/5,543         | 8.5    | 92.6   | reference             |
| Intermediate risk                      | 2/69             | 24.6   | 95.7   | -                     | 127/18,833       | 28.3   | 92.7   | 1.21 (0.79 to 1.85)   |
| High risk                              | 0/27             | 85.2   | 77.8   | -                     | 135/3,944        | 92.8   | 88.7   | 4.53 (2.78 to 7.37)   |

Abbreviations: CT: chemotherapy, ET: endocrine therapy.

<sup>\*</sup> Traditional Cutoffs: low risk: Recurrence Score (RS) ≤17; intermediate risk: RS 18 to 30; high risk: RS ≥31.

<sup>#</sup> TAILORx Cutoffs: low risk: Recurrence Score (RS) ≤10; intermediate risk: RS 11 to 25; high risk: RS ≥ 26.

1. Adjusted for: age (continuous), race, grade, histology type, Progesterone Receptor status, tumor size, lymph nodal status, lymphovascular invasion, comorbidity, surgery, endocrine therapy, radiation therapy, education, income, insurance, year of diagnosis (strata).

2. Additionally adjusted for chemotherapy.

**Supplementary Table S3. HRs (95% CI) for total mortality associated with the Recurrence Score categories among patients > 50 years**

|                                        | Deaths /Patients | CT (%) | ET (%) | Male Patients<br>Hazard Ratio (95% CI) | Deaths /Patients | CT (%) | ET (%) | Female Patients<br>Hazard Ratio (95% CI) |
|----------------------------------------|------------------|--------|--------|----------------------------------------|------------------|--------|--------|------------------------------------------|
| <b>Continuous Scale</b>                |                  |        |        |                                        |                  |        |        |                                          |
| <b>Age-adjusted</b>                    | 37/719           | 20.7   | 85.1   | 1.02 (1.01 to 1.04)                    | 2,238/82,578     | 20.3   | 93.3   | 1.03 (1.02 to 1.03)                      |
| <b>Adjusted<sup>1</sup></b>            | 37/719           | 20.7   | 85.1   | 1.02 (1.00 to 1.05)                    | 2,238/82,578     | 20.3   | 93.3   | 1.02 (1.01 to 1.02)                      |
| <b>Fully-Adjusted<sup>2</sup></b>      | 37/719           | 20.7   | 85.1   | 1.02 (0.99 to 1.05)                    | 2,238/82,578     | 20.3   | 93.3   | 1.02 (1.02 to 1.02)                      |
| <b>Traditional Cutoffs<sup>*</sup></b> |                  |        |        |                                        |                  |        |        |                                          |
| <b>Age-adjusted</b>                    |                  |        |        |                                        |                  |        |        |                                          |
| Low risk                               | 12/427           | 5.4    | 87.8   | reference                              | 1,609/49,091     | 4.7    | 93.7   | reference                                |
| Intermediate risk                      | 17/216           | 31.9   | 80.1   | 2.92 (1.39 to 6.11)                    | 759/26,885       | 33.7   | 93.8   | 1.26 (1.15 to 1.38)                      |
| High risk                              | 8/76             | 75.0   | 84.2   | 3.58 (1.46 to 8.77)                    | 410/6,602        | 81.0   | 88.7   | 2.68 (2.39 to 3.00)                      |
| <b>Adjusted<sup>1</sup></b>            |                  |        |        |                                        |                  |        |        |                                          |
| Low risk                               | 12/427           | 5.4    | 87.8   | reference                              | 1,609/49,091     | 4.7    | 93.7   | reference                                |
| Intermediate risk                      | 17/216           | 31.9   | 80.1   | 1.94 (0.83 to 4.51)                    | 759/26,885       | 33.7   | 93.8   | 1.21 (1.10 to 1.33)                      |
| High risk                              | 8/76             | 75.0   | 84.2   | 1.40 (0.42 to 4.62)                    | 410/6,602        | 81.0   | 88.7   | 1.98 (1.73 to 2.28)                      |
| <b>Fully-Adjusted<sup>2</sup></b>      |                  |        |        |                                        |                  |        |        |                                          |
| Low risk                               | 12/427           | 5.4    | 87.8   | reference                              | 1,609/49,091     | 4.7    | 93.7   | reference                                |
| Intermediate risk                      | 17/216           | 31.9   | 80.1   | 1.88 (0.78 to 4.53)                    | 759/26,885       | 33.7   | 93.8   | 1.26 (1.14 to 1.39)                      |
| High risk                              | 8/76             | 75.0   | 84.2   | 1.30 (0.35 to 4.86)                    | 410/6,602        | 81.0   | 88.7   | 2.23 (1.91 to 2.61)                      |
| <b>TAILORx Cutoffs<sup>#</sup></b>     |                  |        |        |                                        |                  |        |        |                                          |
| <b>Age-adjusted</b>                    |                  |        |        |                                        |                  |        |        |                                          |
| Low risk                               | 2/261            | 6.5    | 87.8   | reference                              | 462/20,386       | 3.3    | 93.0   | reference                                |
| Intermediate risk                      | 21/337           | 14.8   | 84.0   | 8.67 (2.03 to 36.98)                   | 1,162/50,049     | 14.8   | 94.1   | 1.05 (0.94 to 1.17)                      |
| High risk                              | 14/121           | 67.8   | 82.6   | 14.72 (3.34 to 64.76)                  | 614/12,143       | 71.2   | 90.5   | 2.16 (1.92 to 2.44)                      |
| <b>Adjusted<sup>1</sup></b>            |                  |        |        |                                        |                  |        |        |                                          |
| Low risk                               | 2/261            | 6.5    | 87.8   | reference                              | 462/20,386       | 3.3    | 93.0   | reference                                |
| Intermediate risk                      | 21/337           | 14.8   | 84.0   | 1.21 (2.66 to 54.79)                   | 1,162/50,049     | 14.8   | 94.1   | 1.06 (0.95 to 1.18)                      |
| High risk                              | 14/121           | 67.8   | 82.6   | 9.05 (1.76 to 46.53)                   | 614/12,143       | 71.2   | 90.5   | 1.71 (1.49 to 1.97)                      |
| <b>Fully-Adjusted<sup>2</sup></b>      |                  |        |        |                                        |                  |        |        |                                          |
| Low risk                               | 2/261            | 6.5    | 87.8   | reference                              | 462/20,386       | 3.3    | 93.0   | reference                                |
| Intermediate risk                      | 21/337           | 14.8   | 84.0   | 1.21 (2.65 to 54.74)                   | 1,162/50,049     | 14.8   | 94.1   | 1.07 (0.96 to 1.20)                      |
| High risk                              | 14/121           | 67.8   | 82.6   | 8.79 (1.58 to 48.84)                   | 614/12,143       | 71.2   | 90.5   | 1.85 (1.59 to 2.16)                      |

Abbreviations: CT: chemotherapy, ET: endocrine therapy.

<sup>\*</sup> Traditional Cutoffs: low risk: Recurrence Score (RS) ≤17; intermediate risk: RS 18 to 30; high risk: RS ≥31.

<sup>#</sup> TAILORx Cutoffs: low risk: Recurrence Score (RS) ≤10; intermediate risk: RS 11 to 25; high risk: RS ≥26.

1. Adjusted for: age (continuous), race, grade, histology type, Progesterone Receptor status, tumor size, lymph nodal status, lymphovascular invasion, comorbidity, surgery, endocrine therapy, radiation therapy, education, income, insurance, year of diagnosis (strata).

2. Additionally adjusted for chemotherapy.

**Supplementary Table S4. HRs (95% CI) for total mortality associated with chemotherapy status among intermediate-risk patients by age**

|                          | Deaths/Patients | ET (%) | Male Patients<br>Hazard Ratio (95% CI) | Deaths/Patients | ET (%) | Female Patients<br>Hazard Ratio (95% CI) |
|--------------------------|-----------------|--------|----------------------------------------|-----------------|--------|------------------------------------------|
| <b>Age ≤ 50 years</b>    |                 |        |                                        |                 |        |                                          |
| <b>RS 18-30</b>          |                 |        |                                        |                 |        |                                          |
| No Chemotherapy          | 1/23            | 91.3   | reference                              | 44/4,023        | 90.4   | reference                                |
| Chemotherapy             | 1/20            | 100.0  | -                                      | 65/5,154        | 94.3   | 0.96 (0.64 to 1.44)                      |
| <b>RS 11-25</b>          |                 |        |                                        |                 |        |                                          |
| No Chemotherapy          | 1/50            | 96.0   | reference                              | 81/13,174       | 92.5   | reference                                |
| Chemotherapy             | 1/17            | 100.0  | -                                      | 44/5,325        | 94.2   | 0.97 (0.65 to 1.44)                      |
| <b>Age &gt; 50 years</b> |                 |        |                                        |                 |        |                                          |
| <b>RS 18-30</b>          |                 |        |                                        |                 |        |                                          |
| No Chemotherapy          | 10/141          | 84.4   | reference                              | 531/17,437      | 93.8   | reference                                |
| Chemotherapy             | 7/69            | 75.4   | 1.72 (0.34 to 8.67)                    | 217/9,063       | 94.4   | 0.82 (0.69 to 0.97)                      |
| <b>RS 11-25</b>          |                 |        |                                        |                 |        |                                          |
| No Chemotherapy          | 16/279          | 87.1   | reference                              | 994/41,728      | 94.3   | reference                                |
| Chemotherapy             | 5/50            | 72.0   | 2.41 (0.55 to 10.51)                   | 150/7,425       | 94.6   | 0.87 (0.73 to 1.04)                      |

Abbreviations: ET: endocrine therapy; RS: Oncotype DX Breast Recurrence Score.

\* Patients with unknown chemotherapy status were excluded from this analysis.

Adjusted for: age (continuous), race, grade, histology type, Progesterone Receptor status, tumor size, lymph nodal status, lymphovascular invasion, comorbidity, surgery, endocrine therapy, radiation therapy, education, income, insurance, year of diagnosis (strata).

**Supplementary Table S5. HRs (95% CI) for total mortality associated with Recurrence Score categories (sensitivity analysis)**

|                                   | Deaths/Patients | CT (%) | Male Patients         |  | Deaths/Patients | CT (%) | Female Patients       |  |
|-----------------------------------|-----------------|--------|-----------------------|--|-----------------|--------|-----------------------|--|
|                                   |                 |        | Hazard Ratio (95% CI) |  |                 |        | Hazard Ratio (95% CI) |  |
| <b>Continuous Scale</b>           |                 |        |                       |  |                 |        |                       |  |
| <b>Age-adjusted</b>               | 22/595          | 19.7   | 1.02 (1.00 to 1.05)   |  | 1,647/85,386    | 20.8   | 1.03 (1.03 to 1.03)   |  |
| <b>Adjusted<sup>1</sup></b>       | 22/595          | 19.7   | 1.02 (0.98 to 1.06)   |  | 1,647/85,386    | 20.8   | 1.02 (1.02 to 1.03)   |  |
| <b>Fully-Adjusted<sup>2</sup></b> | 22/595          | 19.7   | 1.02 (0.98 to 1.06)   |  | 1,647/85,386    | 20.8   | 1.02 (1.02 to 1.03)   |  |
| <b>Traditional Cutoffs *</b>      |                 |        |                       |  |                 |        |                       |  |
| <b>Age-adjusted</b>               |                 |        |                       |  |                 |        |                       |  |
| Low risk                          | 9/355           | 4.2    | reference             |  | 771/50,644      | 3.6    | reference             |  |
| Intermediate risk                 | 12/181          | 29.8   | 2.58 (1.08 to 6.15)   |  | 545/28,102      | 36.7   | 1.21 (1.08 to 1.35)   |  |
| High risk                         | 1/59            | 81.4   | 0.69 (0.08 to 5.28)   |  | 331/6,640       | 85.0   | 2.97 (2.61 to 3.38)   |  |
| <b>Adjusted<sup>1</sup></b>       |                 |        |                       |  |                 |        |                       |  |
| Low risk                          | 9/355           | 4.2    | reference             |  | 771/50,644      | 3.6    | reference             |  |
| Intermediate risk                 | 12/181          | 29.8   | 1.72 (0.63 to 4.72)   |  | 545/28,102      | 36.7   | 1.15 (1.03 to 1.29)   |  |
| High risk                         | 1/59            | 81.4   | 0.34 (0.03 to 3.03)   |  | 331/6,640       | 85.0   | 2.21 (1.89 to 2.59)   |  |
| <b>Fully-Adjusted<sup>2</sup></b> |                 |        |                       |  |                 |        |                       |  |
| Low risk                          | 9/355           | 4.2    | reference             |  | 771/50,644      | 3.6    | reference             |  |
| Intermediate risk                 | 12/181          | 29.8   | 1.47 (0.51 to 4.21)   |  | 545/28,102      | 36.7   | 1.20 (1.07 to 1.35)   |  |
| High risk                         | 1/59            | 81.4   | 0.18 (0.02 to 2.06)   |  | 331/6,640       | 85.0   | 2.48 (2.07 to 2.99)   |  |
| <b>TAILORx Cutoffs #</b>          |                 |        |                       |  |                 |        |                       |  |
| <b>Age-adjusted</b>               |                 |        |                       |  |                 |        |                       |  |
| Low risk                          | 2/204           | 4.4    | reference             |  | 323/19,857      | 1.8    | reference             |  |
| Intermediate risk                 | 15/295          | 13.2   | 5.31 (1.21 to 23.27)  |  | 842/53,237      | 15.3   | 1.02 (0.89 to 1.16)   |  |
| High risk                         | 5/96            | 71.9   | 5.05 (0.98 to 26.06)  |  | 482/12,292      | 75.5   | 2.30 (1.99 to 2.64)   |  |
| <b>Adjusted<sup>1</sup></b>       |                 |        |                       |  |                 |        |                       |  |
| Low risk                          | 2/204           | 4.4    | reference             |  | 323/19,857      | 1.8    | reference             |  |
| Intermediate risk                 | 15/295          | 13.2   | 5.44 (1.20 to 24.58)  |  | 842/53,237      | 15.3   | 1.02 (0.89 to 1.16)   |  |
| High risk                         | 5/96            | 71.9   | 4.69 (0.79 to 27.76)  |  | 482/12,292      | 75.5   | 1.79 (1.53 to 2.11)   |  |
| <b>Fully-Adjusted<sup>2</sup></b> |                 |        |                       |  |                 |        |                       |  |
| Low risk                          | 2/204           | 4.4    | reference             |  | 323/19,857      | 1.8    | reference             |  |
| Intermediate risk                 | 15/295          | 13.2   | 5.21 (1.14 to 23.74)  |  | 842/53,237      | 15.3   | 1.03 (0.90 to 1.17)   |  |
| High risk                         | 5/96            | 71.9   | 3.93 (0.59 to 26.10)  |  | 482/12,292      | 75.5   | 1.93 (1.61 to 2.30)   |  |

Sensitivity analysis: Only patients with negative lymph node and receipt of endocrine therapy was included.

Ten female patients who died within 30 days after surgery were excluded from this analysis.

Abbreviations: CT: chemotherapy, ET: endocrine therapy.

\* Traditional Cutoffs: low risk: Recurrence Score (RS)  $\leq 17$ ; intermediate risk: RS 18 to 30; high risk: RS  $\geq 31$ . Based on the fully adjusted model, *P* value for interaction between RS and sex was 0.007.

# TAILORx Cutoffs: low risk: Recurrence Score (RS)  $\leq 10$ ; intermediate risk: RS 11 to 25; high risk: RS  $\geq 26$ . Based on the fully adjusted model, *P* value for interaction between RS and sex was 0.02.

1. Adjusted for: age (continuous), race, grade, histology type, Progesterone Receptor status, tumor size, lymph nodal status, lymphovascular invasion, comorbidity, surgery, endocrine therapy, radiation therapy, education, income, insurance, year of diagnosis (strata).

2. Additionally adjusted for chemotherapy.
